# Supplementary material for: Unveiling the Interplay between the TLR4/MD2 Complex and HSP70 in the Human Cardiovascular System: A Computational Approach
Source: MDPI journal article supplement (doi:10.3390/ijms20133121), 2019-06-26
Supplement: s1 [file s1]

# Supplementary Materials: Unveiling the interplay between the TLR4/MD2 complex and HSP70 in the human cardiovascular system: a computational approach

Amanda Almeida de Oliveira<sup>1,†</sup> , Josemar Faustino<sup>2,†</sup> , Maria Elena de Lima<sup>3</sup>, Ronaldo Menezes<sup>4</sup> , and Kenia Nunes<sup>1,\*</sup> 

| Description                    | Value |
|--------------------------------|-------|
| Number of nodes                | 14    |
| Number of edges                | 61    |
| Graph density                  | 0.670 |
| Network diameter               | 3     |
| Average path length            | 1.417 |
| Average degree                 | 8.714 |
| Number of communities          | 6     |
| Average clustering coefficient | 0.912 |

**Table S1.** Descriptive values for the protein-protein interaction network of TLR4/MD2 and HSP70 family.

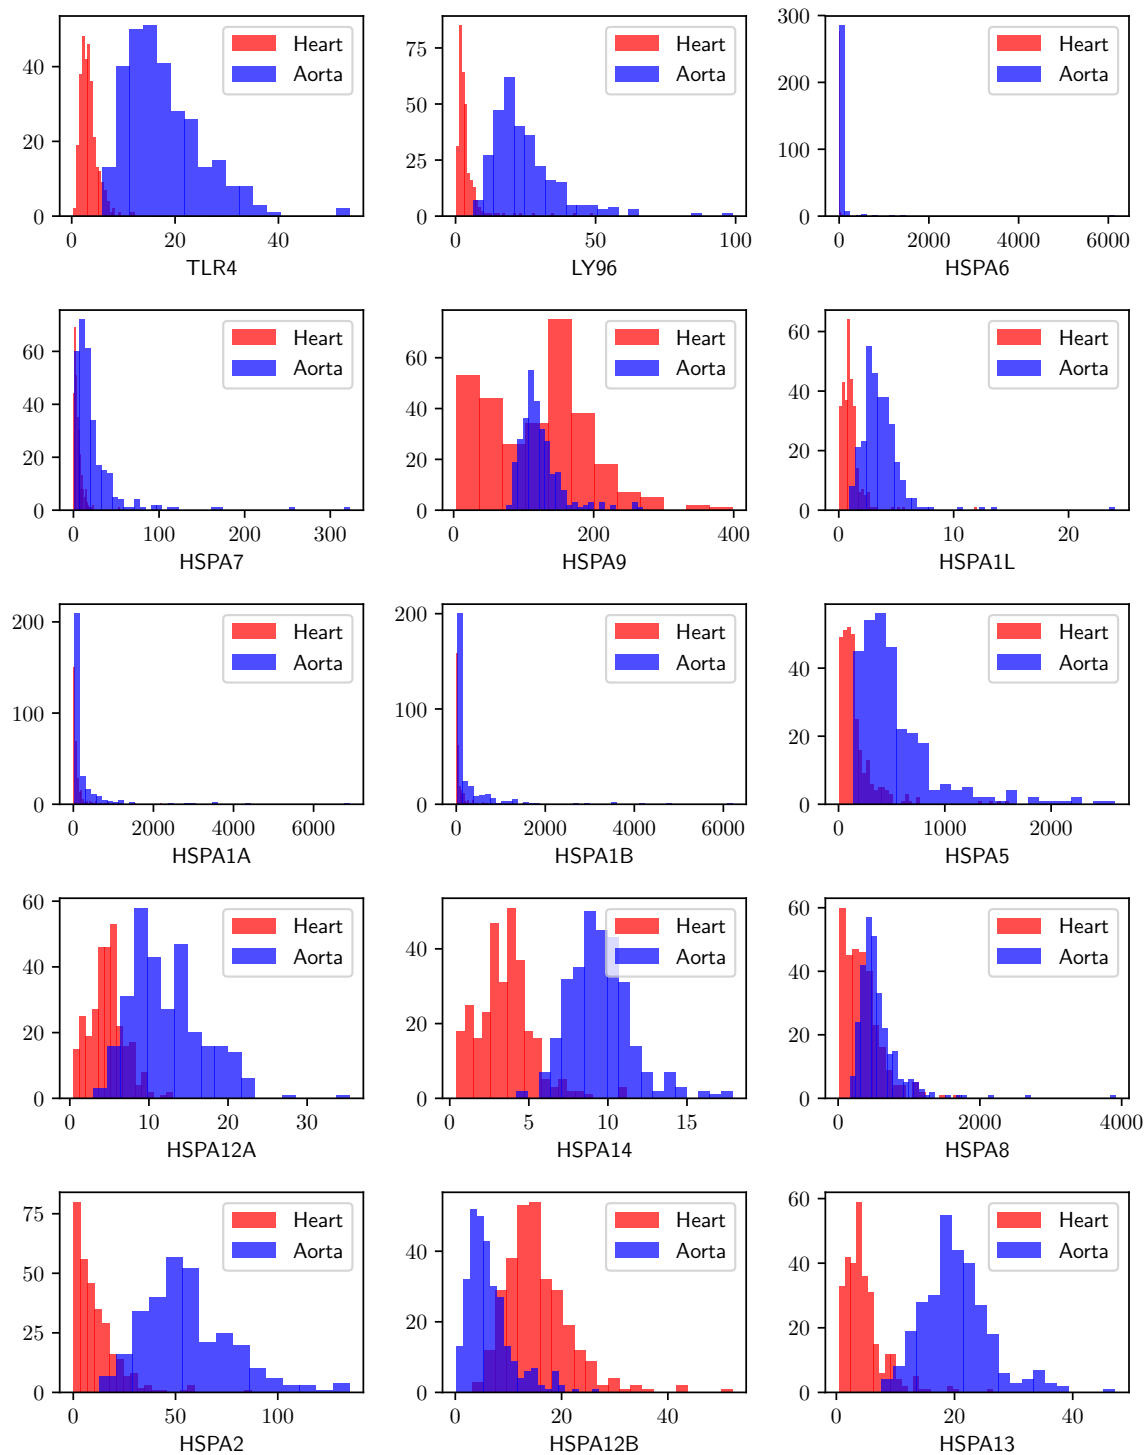

**Figure S1.** Distribution of RNA expression of TLR4, MD2 and HSP70 family genes.

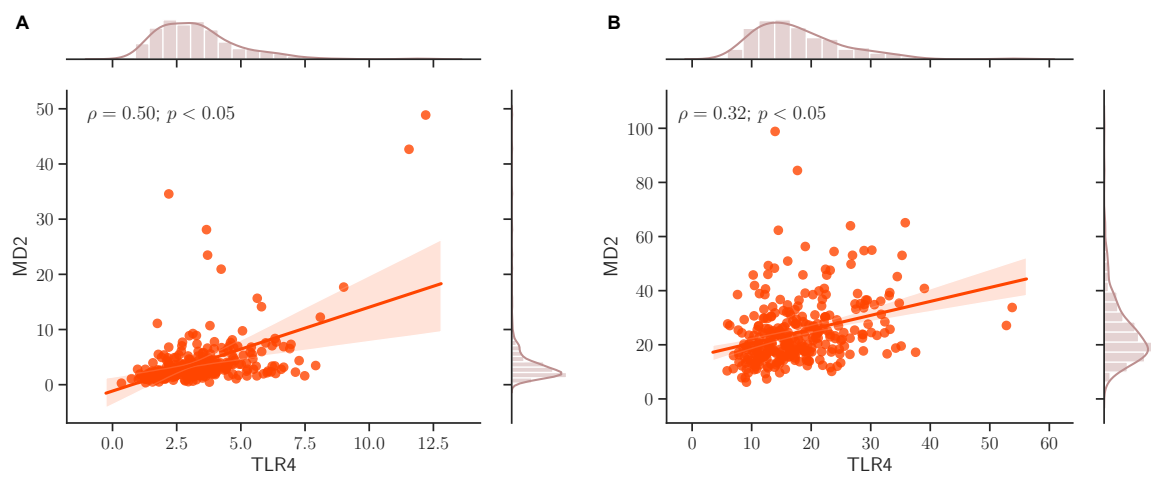

**Figure S2.** Scatter plots of the relationship between expression values in heart (left ventricle) (A) and aorta (B) of TLR4 with MD2, as well as Pearson correlation  $\rho$  coefficient.

|       |      | HSPA6  | HSPA7  | HSPA9   | HSPA1L  | HSPA1A | HSPA1B | HSPA5   | HSPA12A | HSPA14  | HSPA8  | HSPA2   | HSPA12B | HSPA13  |
|-------|------|--------|--------|---------|---------|--------|--------|---------|---------|---------|--------|---------|---------|---------|
| Heart | TLR4 | 0.1470 | 0.2957 | 0.3664  | 0.2745  | 0.1696 | 0.1526 | 0.4282  | 0.4710  | 0.5911  | 0.3468 | 0.1855  | 0.3246  | 0.5841  |
|       | MD2  | 0.1411 | 0.3108 | 0.3932  | 0.2366  | 0.0681 | 0.0541 | 0.5690  | 0.3579  | 0.5809  | 0.4907 | 0.0997  | 0.4304  | 0.6523  |
| Aorta | TLR4 | 0.2323 | 0.1935 | -0.0413 | 0.2299  | 0.0641 | 0.0117 | -0.1839 | -0.0880 | 0.1598  | 0.1479 | -0.0240 | 0.2230  | 0.1793  |
|       | MD2  | 0.0702 | 0.4447 | -0.0897 | -0.0101 | 0.1400 | 0.1214 | 0.0192  | -0.2206 | -0.0449 | 0.0937 | -0.2006 | 0.2908  | -0.0942 |

**Table S2.**  $\rho$  correlation values for TLR4, MD2 and HSP70 family genes

|       |      | HSPA6    | HSPA7      | HSPA9      | HSPA1L   | HSPA1A | HSPA1B | HSPA5      | HSPA12A    | HSPA14     | HSPA8      | HSPA2  | HSPA12B    | HSPA13     |
|-------|------|----------|------------|------------|----------|--------|--------|------------|------------|------------|------------|--------|------------|------------|
| Heart | TLR4 | 0.0104   | $\ll 0.01$ | $\ll 0.01$ | $< 0.01$ | 0.0031 | 0.0078 | $\ll 0.01$ | $\ll 0.01$ | $\ll 0.01$ | $\ll 0.01$ | 0.012  | $\ll 0.01$ | $\ll 0.01$ |
|       | MD2  | 0.0140   | $\ll 0.01$ | $\ll 0.01$ | $< 0.01$ | 0.2370 | 0.3481 | $\ll 0.01$ | $\ll 0.01$ | $\ll 0.01$ | $\ll 0.01$ | 0.0833 | $\ll 0.01$ | $\ll 0.01$ |
| Aorta | TLR4 | $< 0.01$ | $\ll 0.01$ | $\ll 0.01$ | 0.0001   | 0.2695 | 0.8404 | $\ll 0.01$ | $\ll 0.01$ | $\ll 0.01$ | $\ll 0.01$ | 0.6800 | $\ll 0.01$ | $\ll 0.01$ |
|       | MD2  | 0.2264   | $\ll 0.01$ | $\ll 0.01$ | 0.8622   | 0.0154 | 0.0358 | $\ll 0.01$ | $\ll 0.01$ | $\ll 0.01$ | $\ll 0.01$ | 0.0005 | $\ll 0.01$ | $\ll 0.01$ |

**Table S3.**  $p$  – values for the Pearson  $\rho$  correlation of TLR4, MD2 and HSP70 family genes
